# Supplementary material
Source: publisher site journal article supplement (https://www.dovepress.com/article/547265)
Supplement: Supplementary file 1 [file 547265%20Supplementary%20Material.docx]

**Supplementary Material:**

**Supplementary Figure S1： Behavior and Lifestyle Compliance Assessment Scale**

| NO. | Questions | Never | Occasional | Often | Always |
| --- | --- | --- | --- | --- | --- |
| 1 | Do you [purchase](javascript:;) medicines by yourself based on your friends' recommendations, advertisements, or your own experience? | 4 | 3 | 2 | 1 |
| 2 | Do you follow your doctor's advice to eat the right amount of calories, eat regularly, and control your weight? | 1 | 2 | 3 | 4 |
| 3 | Will you be careful to put less salt in your diet (< 6g/ day) and eat less or no salty food? | 1 | 2 | 3 | 4 |
| 4 | Do you pay attention to reducing the intake of oil in your diet (25-30g/d) and do not eat fatty meat? | 1 | 2 | 3 | 4 |
| 5 | Do you add fresh vegetables (> 500g/d) and fruit to your diet? | 1 | 2 | 3 | 4 |
| 6 | Do you consume moderate amounts of protein (0.8g/kg/d), fish, poultry, eggs, and lean meat (120-200g/d) daily? | 1 | 2 | 3 | 4 |
| 7 | Do you exercise regularly (Aerobic exercise, 30 minutes or more, 3-5 times a week)? | 1 | 2 | 3 | 4 |
| 8 | Do you regularly monitor blood pressure, glucose, lipids, uric acid, and other indicators as recommended by medical staff? | 1 | 2 | 3 | 4 |
| 9 | Are you able to follow the doctor's orders? | 1 | 2 | 3 | 4 |

**Supplementary Figure S2：** **Medication Adherence Assessment Scale**

| NO. | Medication adherence questions | Never | Occasional | Often | Always |
| --- | --- | --- | --- | --- | --- |
| 1 | Do you take or used medication as prescribed by the doctor every day for the last 3 months? | 1 | 2 | 3 | 4 |
| 2 | Do ​you sometimes forget to take or use medication for the last 3 months? | 4 | 3 | 2 | 1 |
| 3 | Do you take every medication as prescribed dosage? | 1 | 2 | 3 | 4 |
| 4 | No attention was paid to the time interval between the medications | 4 | 3 | 2 | 1 |
| 5 | Do you adjust your dosage or stop taking your medication without consulting your doctor when symptoms change or other symptoms occur? | 4 | 3 | 2 | 1 |
| 6 | Do you have trouble remembering to take your medication on time and in the dose? | 4 | 3 | 2 | 1 |
| 7 | Have you visited the hospital on time in the last 3 months? | 1 | 2 | 3 | 4 |
| 8 | Do you know the indications and precautions for each drug? | 1 | 2 | 3 | 4 |
| 9 | Do you think the more expensive the drug, the safer and more effective it is? | 4 | 3 | 2 | 1 |
